# Supplementary material
Source: Springer Nature journal article supplement (https://www.springermedizin.de/resource/supplementary/12889_2012_5417_MOESM1_ESM.pdf/9495244)

## SEARCH 1

**Databases searched:** Project Cork; NDARC Library catalogue; DRUG; Indigenous Australia; Indigenous Studies Bibliography: AIATSIS; ATSIHealth; APAIS-ATSIS; FAMILY-ATSIS; Campbell Library; Cochrane Library; PsycINFO; PsycEXTRA; Medline; Embase; CINAHL; Global Health.

Separate searches for each database using database specific subject headings and keywords:

**Search strategy:** suicid\* + (Indigenous OR Aborigin\* OR Torres Strait Islander\* OR Native American\* OR Inuit\* OR Maori) + (prevention OR intervention OR program\* OR policy OR policies OR postvention)

**Years searched:** 1981 – 2012 (May)

**Search 1 = 1221 publications (after electronic removal of duplicates)**

## SEARCH 2

### Websites searched:

**Australia:** Indigenous HealthInfoNet; Closing the gap clearinghouse; Life is for Everyone; Australian Institute for Suicide Research and Prevention, Griffith University; Centre for Suicide Prevention Studies, UQ.

**Canada:** The National Collaborating Centre for Aboriginal Health; National Aboriginal Health Organization.

**New Zealand:** Maori Health

**USA:** American Indian and Alaska Native Suicide Prevention Website; American Indian Health; Arctic *Health*; One Sky Center; Turtle Island Native Network.

**Search strategy:** Keywords and/or the appropriate topic headings in each website: Suicid\* OR Aborigin\* OR Indigenous OR Native OR Inuit OR Maori

**Years searched:** 1981 – 2012 (May)

**Search 2 = 118 publications (after removal of duplicates)**

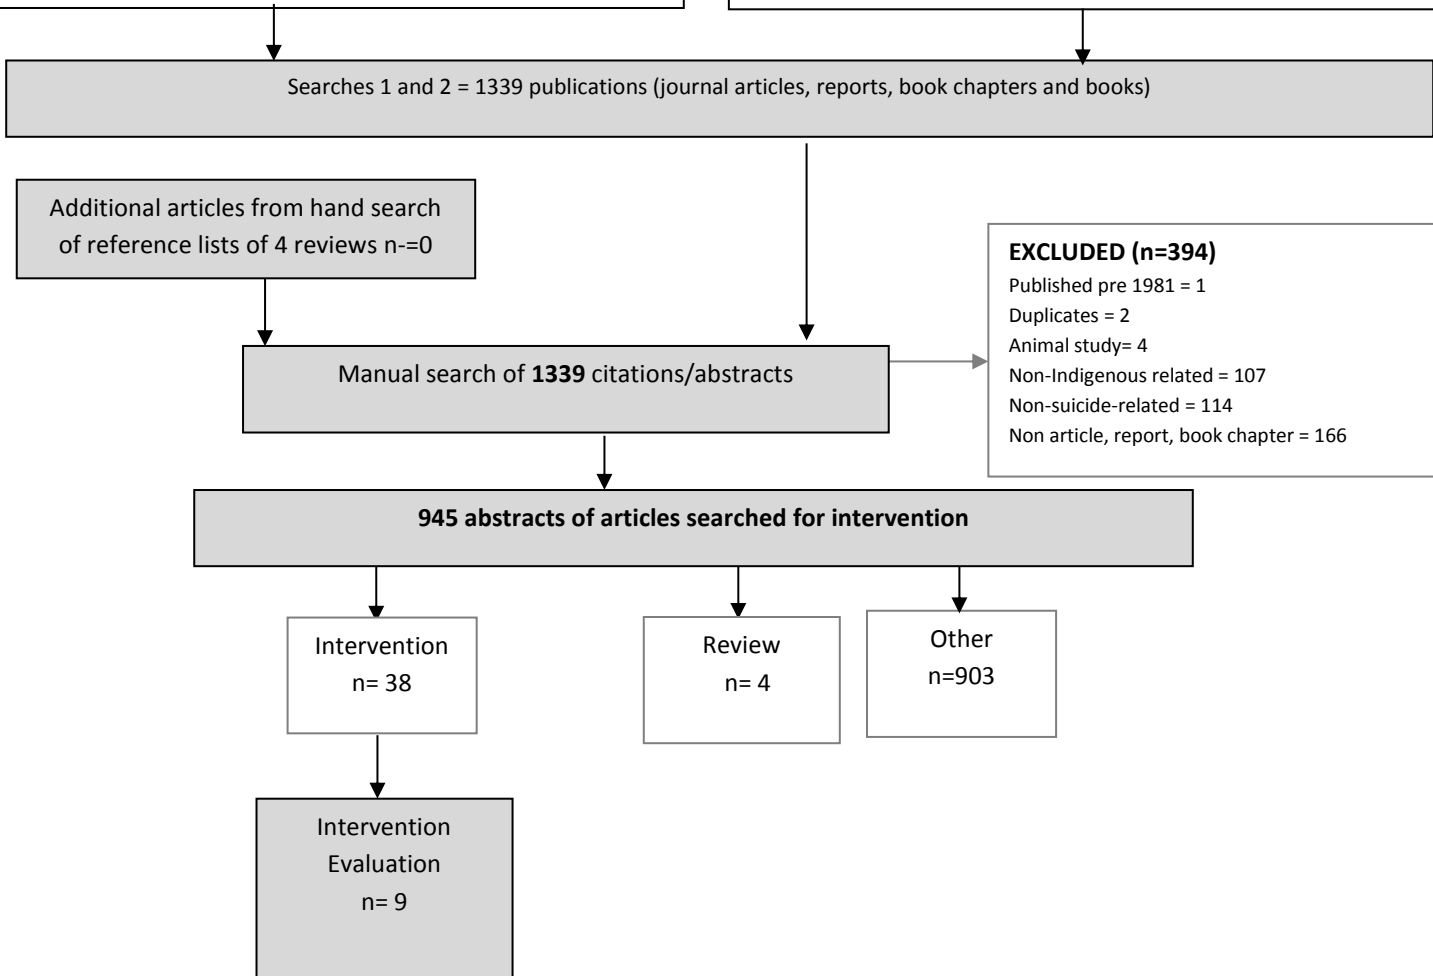

Supplement: MOESM1 [file 9495244]
